# Supplementary material for: Disseminated intravascular coagulation immediately after trauma predicts a poor prognosis in severely injured patients
Source: PubMed Central journal article supplement (PMC8154895; doi:10.1038/s41598-021-90492-0), 2021-05-26
Supplement: 41598_2021_90492_MOESM1_ESM.pdf [file 41598_2021_90492_MOESM1_ESM.pdf]

**Disseminated intravascular coagulation immediately after trauma predicts a poor prognosis in severely injured patients**

Takeshi Wada<sup>1\*</sup>, Atsushi Shiraishi<sup>2</sup>, Satoshi Gando<sup>1,3</sup>, Kazuma Yamakawa<sup>4</sup>, Seitaro Fujishima<sup>5</sup>, Daizoh Saitoh<sup>6</sup>, Shigeki Kushimoto<sup>7</sup>, Hiroshi Ogura<sup>8</sup>, Toshikazu Abe<sup>9,10</sup>, Toshihiko Mayumi<sup>11</sup>, Junichi Sasaki<sup>12</sup>, Joji Kotani<sup>13</sup>, Naoshi Takeyama<sup>14</sup>, Ryosuke Tsuruta<sup>15</sup>, Kiyotsugu Takuma<sup>16</sup>, Norio Yamashita<sup>17</sup>, Shin-ichiro Shiraishi<sup>18</sup>, Hiroto Ikeda<sup>19</sup>, Yasukazu Shiino<sup>20</sup>, Takehiko Tarui<sup>21</sup>, Taka-aki Nakada<sup>22</sup>, Toru Hifumi<sup>23</sup>, Kohji Okamoto<sup>24</sup>, Yuichiro Sakamoto<sup>25</sup>, Akiyoshi Hagiwara<sup>26</sup>, Tomohiko Masuno<sup>27</sup>, Masashi Ueyama<sup>28</sup>, Satoshi Fujimi<sup>29</sup>, Yutaka Umemura<sup>8</sup>, Yasuhiro Otomo<sup>30</sup>

<sup>1</sup>Division of Acute and Critical Care Medicine, Department of Anesthesiology and Critical Care Medicine, Hokkaido University Faculty of Medicine, Japan

<sup>2</sup>Emergency and Trauma Center, Kameda Medical Center, Japan

<sup>3</sup>Department of Acute and Critical Care Medicine, Sapporo Higashi Tokushukai Hospital, Japan

<sup>4</sup>Department of Emergency Medicine, Osaka Medical College, Japan

<sup>5</sup>Center for General Medicine Education, Keio University School of Medicine, Japan

<sup>6</sup>Division of Traumatology, Research Institute, National Defense Medical College, Japan

<sup>7</sup>Division of Emergency and Critical Care Medicine, Tohoku University Graduate School of Medicine, Japan

<sup>8</sup>Department of Traumatology and Acute Critical Medicine, Osaka University Graduate School

of Medicine, Japan

<sup>9</sup>Department of Emergency and Critical Care Medicine, Tsukuba Memorial Hospital, Tsukuba, Japan

<sup>10</sup>Health Services Research and Development Center, University of Tsukuba, Japan

<sup>11</sup>Department of Emergency Medicine, School of Medicine, University of Occupational and Environmental Health, Japan

<sup>12</sup>Department of Emergency and Critical Care Medicine, Keio University School of Medicine, Japan

<sup>13</sup>Division of Disaster and Emergency Medicine, Department of Surgery Related, Kobe University Graduate School of Medicine, Japan

<sup>14</sup>Advanced Critical Care Center, Aichi Medical University Hospital, Japan

<sup>15</sup>Advanced Medical Emergency & Critical Care Center, Yamaguchi University Hospital, Japan

<sup>16</sup>Emergency & Critical Care Center, Kawasaki Municipal Hospital, Japan

<sup>17</sup>Department of Emergency & Critical Care Medicine, School of Medicine, Kurume University, Japan

<sup>18</sup>Department of Emergency and Critical Care Medicine, Aizu Chuo Hospital, Japan

<sup>19</sup>Department of Emergency Medicine, Trauma and Resuscitation Center, Teikyo University School of Medicine, Japan

<sup>20</sup>Department of Acute Medicine, Kawasaki Medical School, Japan

<sup>21</sup>Department of Trauma and Critical Care Medicine, Kyorin University School of Medicine, Japan

<sup>22</sup>Department of Emergency and Critical Care Medicine, Chiba University Graduate School of Medicine, Japan

<sup>23</sup>Department of Emergency and Critical Care Medicine, St. Luke's International Hospital, Japan

<sup>24</sup>Department of Surgery, Center for Gastroenterology and Liver Disease, Kitakyushu City Yahata Hospital, Japan

<sup>25</sup>Emergency and Critical Care Medicine, Saga University Hospital, Japan

<sup>26</sup>Center Hospital of the National Center for Global Health and Medicine, Japan

<sup>27</sup>Department of Emergency and Critical Care Medicine, Nippon Medical School, Japan

<sup>28</sup>Department of Trauma, Critical Care Medicine, and Burn Center, Japan; Community Healthcare Organization, Chukyo Hospital, Japan

<sup>29</sup>Division of Trauma and Surgical Critical Care, Osaka General Medical Center, Japan

<sup>30</sup>Trauma and Acute Critical Care Center, Medical Hospital, Tokyo Medical and Dental University, Japan

Correspondence and requests for materials should be addressed to Takeshi Wada

Email: [twadal@med.hokudai.ac.jp](mailto:twadal@med.hokudai.ac.jp)

Division of Acute and Critical Care Medicine, Department of Anesthesiology and Critical Care Medicine, Hokkaido university Graduate School of Medicine

N15, W7, Kita-ku, Sapporo Japan.

Table S1. Japanese Association for Acute Medicine disseminated intravascular coagulation scoring system

|                                                           | Score |
|-----------------------------------------------------------|-------|
| Systemic inflammatory response syndrome criteria          |       |
| $\geq 3$                                                  | 1     |
| 0-2                                                       | 0     |
| Platelet counts ( $10^9/L$ )                              |       |
| $<80$ or a $\geq 50\%$ decrease within 24 h               | 3     |
| $\geq 80$ to $<120$ or a $\geq 30\%$ decrease within 24 h | 1     |
| $\geq 120$                                                |       |
| 0                                                         |       |
| Prothrombin time (value of patient/normal value)          |       |
| $\geq 1.2$                                                | 1     |
| $<1.2$                                                    | 0     |
| Fibrin/fibrinogen degradation products (mg/L)             |       |
| $\geq 25$                                                 | 3     |
| $\geq 10$ to $<25$                                        | 1     |
| $<10$                                                     | 0     |
| Diagnosis                                                 |       |
| Four points or more                                       | DIC   |

The detailed scoring system is described in reference 16.

Table S2. Abbreviated injury scale and Glasgow Coma Scale of the patients

|                                 | Non-DIC    | DIC       | <i>P</i> -Value |
|---------------------------------|------------|-----------|-----------------|
| <b>Abbreviated injury scale</b> |            |           |                 |
| Head                            | 3 (0-4)    | 3 (0-4)   | 0.138           |
| Face                            | 0 (0 -1)   | 0 (0-0)   | 0.391           |
| Neck                            | 0 (0-0)    | 0(0-0)    | 0.597           |
| Thorax                          | 3 (0-4)    | 3(0-4)    | 0.007           |
| Abdomen                         | 0 (0-0)    | 0 (0-2)   | 0.005           |
| <b>Spine</b>                    |            |           |                 |
| Cervical                        | 0 (0-0)    | 0 (0-0)   | 0.421           |
| Thoracic                        | 0 (0-0)    | 0 (0-0)   | 0.522           |
| Lumbar                          | 0 (0-0)    | 0 (0-1)   | 0.001           |
| Upper extremity                 | 0 (0-1)    | 0 (0-2)   | 0.169           |
| Lower extremity                 | 0 (0-2)    | 2 (0-3)   | <0.001          |
| External                        | 0 (0-1)    | 0 (0-1)   | 0.053           |
| <b>Glasgow Coma Scale</b>       |            |           |                 |
| 0 h                             | 14 (11-15) | 12 (6-14) | <0.001          |
| 3 h                             | 14 (7-15)  | 7 (3-14)  | <0.001          |
| 24 h                            | 15 (10-15) | 9 (3-14)  | <0.001          |

Values are expressed as the median with the 25<sup>th</sup> -75<sup>th</sup> interquartile range.

DIC, disseminated intravascular coagulation

Table S3. Disseminated intravascular coagulation scores, platelet counts, global markers of coagulation and fibrinolysis

|                                           | 0 h                            | 3 h                            | 24 h                           |
|-------------------------------------------|--------------------------------|--------------------------------|--------------------------------|
| <b>DIC score</b>                          |                                |                                |                                |
| Non-DIC                                   | 3(1-3)                         | 3(1-4)                         | 2(1-4)                         |
| DIC                                       | 4(4-5) <sup>c</sup>            | 5(4-6) <sup>c,y</sup>          | 4(3-6) <sup>c</sup>            |
| <b>Platelet counts (10<sup>9</sup>/L)</b> |                                |                                |                                |
| Non-DIC                                   | 220(186-250)                   | 181(130-214)                   | 159(118-194)                   |
| DIC                                       | 201(161-257) <sup>a</sup>      | 132(90-177) <sup>c,z</sup>     | 110(79-150) <sup>c,z</sup>     |
| <b>Prothrombin time (sec)</b>             |                                |                                |                                |
| Non-DIC                                   | 12.1(11.4-13.0)                | 12.8(12.0-14.0)                | 12.8(12.2-13.8)                |
| DIC                                       | 13.4(12.2-15.0) <sup>c</sup>   | 14.5(13.0-15.9) <sup>c,y</sup> | 13.5(12.7-14.6) <sup>b</sup>   |
| <b>Prothrombin time INR</b>               |                                |                                |                                |
| Non-DIC                                   | 1.02(1.02-1.09)                | 1.09(1.00-1.15)                | 1.09(1.03-1.15)                |
| DIC                                       | 1.12(1.02-1.23) <sup>c</sup>   | 1.20(1.07-1.32) <sup>c,y</sup> | 1.12(1.05-1.22) <sup>c</sup>   |
| <b>APTT (sec)</b>                         |                                |                                |                                |
| Non-DIC                                   | 26.8(24.6-29.8)                | 29.1(26.4-32.3)                | 31.3(28.8-34.0)                |
| DIC                                       | 29.1(25.8-37.0) <sup>c</sup>   | 33.4(27.5-40.6) <sup>c,y</sup> | 33.1(29.0-37.1) <sup>z</sup>   |
| <b>Fibrinogen (g/L)</b>                   |                                |                                |                                |
| Non-DIC                                   | 2.38(2.11-2.85)                | 2.05(1.70-2.60)                | 3.02(2.59-3.85)                |
| DIC                                       | 2.07(1.61-2.47) <sup>c</sup>   | 1.67(1.19-2.08) <sup>c,z</sup> | 2.78(2.38-3.47) <sup>a,z</sup> |
| <b>FDP (mg/L)</b>                         |                                |                                |                                |
| Non-DIC                                   | 31.0(14.5-87.5)                | 40.0(13.3-103.8)               | 17.0(7.0-38.4)                 |
| DIC                                       | 117.0(60.6-258.5) <sup>c</sup> | 100.5(55.3-198.4) <sup>c</sup> | 32.3(15.3-64.6) <sup>c,z</sup> |
| <b>FDP/D-dimer ratio</b>                  |                                |                                |                                |
| Non-DIC                                   | 2.21(1.53-3.13)                | 2.02(1.52-2.58)                | 2.19(1.87-2.55)                |
| DIC                                       | 2.76(2.08-3.52) <sup>b</sup>   | 2.31(1.67-3.45) <sup>a</sup>   | 2.11(1.80-2.37) <sup>z</sup>   |

Values are expressed as the median with the 25<sup>th</sup> -75<sup>th</sup> interquartile range.

APTT, activated partial thromboplastin time; DIC, disseminated intravascular coagulation; FDP, fibrin/fibrinogen degradation products; INR, international normalized ratio. a,  $P < 0.05$ ; b,  $P < 0.01$ ; c,  $P < 0.001$  vs. non-DIC. x,  $P < 0.05$ ; y,  $P < 0.01$ ; z,  $P < 0.001$  vs. 0 h.

Table S4. Demographics of the 9 patients who died within 24-h after arrival

---

|                                 |                 |
|---------------------------------|-----------------|
| Age (year)                      | 60 (35-88)      |
| Male gender n (%)               | 7 (77.8)        |
| DIC n (%)                       | 9 (100)         |
| DIC score at 0 h                | 4 (4-5)         |
| DIC score at 3 h                | 7 (4-8)         |
| Injury Severity Score           | 34 (24-52)      |
| Abbreviated injury scale        |                 |
| Head                            | 5.0 (2.5-5.0)   |
| Shock n (%)                     | 5 (55.6)        |
| Hemodynamics                    |                 |
| 0 h                             |                 |
| Systolic blood pressure (mmHg)  | 71 (52-113)     |
| Diastolic blood pressure (mmHg) | 37 (25-59)      |
| Heart rate (beats/min)          | 104 (93-129)    |
| Respiratory rate (times/min)    | 15 (11-30)      |
| 3 h                             |                 |
| Systolic blood pressure (mmHg)  | 86 (51-100)     |
| Diastolic blood pressure (mmHg) | 45 (24-64)      |
| Heart rate (beats/min)          | 96 (72-107)     |
| Respiratory rate (times/min)    | 19 (24)         |
| Massive transfusion n (%)       | 3 (33.3)        |
| 3-h transfusion                 |                 |
| Packed red blood cell (ml)      | 1400 (280-2100) |
| Fresh frozen plasma             | 1440 (240-1680) |
| Platelet concentrate (U)        | 0 (0-20)        |

---

Values are expressed as the median with the 25<sup>th</sup> -75<sup>th</sup> interquartile range or number (percentage).

DIC, disseminated intravascular coagulation

Table S5. Utility of soluble fibrin, plasmin antiplasmin complex, plasminogen activator inhibitor-1 for the detection of massive transfusion and multiple organ dysfunction syndrome within 24 h of and at 24 h after admission

|                                       | AUC (SE)     | <i>P</i> -Value |
|---------------------------------------|--------------|-----------------|
| Massive transfusion                   |              |                 |
| Soluble fibrin 0 h                    | 0.627 (0.05) | 0.023           |
| Soluble fibrin 3 h                    | 0.530 (0.05) | 0.588           |
| Plasmin antiplasmin complex 0 h       | 0.685 (0.05) | 0.001           |
| Plasmin antiplasmin complex 3 h       | 0.552 (0.05) | 0.357           |
| Plasminogen activator inhibitor-1 0 h | 0.535 (0.05) | 0.530           |
| Plasminogen activator inhibitor-1 3 h | 0.638 (0.05) | 0.014           |
| Multiple organ dysfunction syndrome   |              |                 |
| Soluble fibrin 0 h                    | 0.696 (0.04) | <0.001          |
| Soluble fibrin 3 h                    | 0.600 (0.04) | 0.025           |
| Plasmin antiplasmin complex 0 h       | 0.653 (0.04) | 0.001           |
| Plasmin antiplasmin complex 3 h       | 0.640 (0.05) | 0.002           |
| Plasminogen activator inhibitor-1 0 h | 0.566 (0.05) | 0.139           |
| Plasminogen activator inhibitor-1 3 h | 0.622 (0.04) | 0.006           |

AUC, area under receiver operating characteristic curve; SE, standard error.



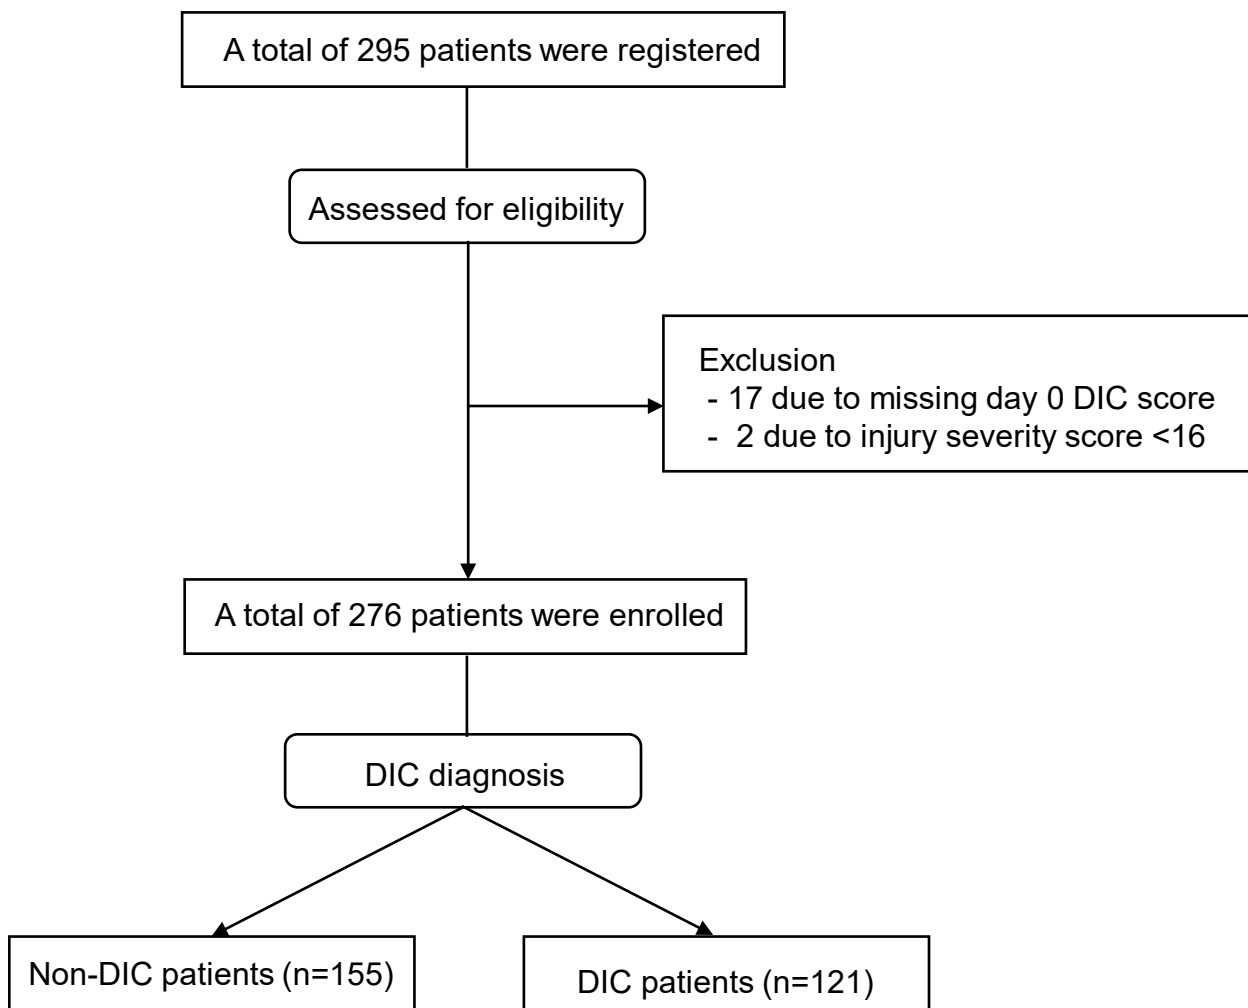

Figure S1
